# Supplementary material for: Benchmarking dual-level MS-Tor and DLPNO-CCSD(T) methods for H-abstraction from methyl pentanoate by an OH radical
Source: Royal Society of Chemistry journal article supplement (doi:10.1039/c9cp03832a), 2019-01-01
Supplement: c9cp03832a1.pdf [file c9cp03832a1.pdf]

# Benchmarking Dual-level MS-T and DLPNO-CCSD(T) Methods for H-abstraction from Methyl Pentanoate by OH radical

Yanlei Shang<sup>a,b</sup>, Hongbo Ning<sup>\*,a,b</sup>, Jinchun Shi<sup>\*,a,b</sup>, Hongyan Wang<sup>c</sup> and Sheng-Nian Luo<sup>a,b,d</sup>

<sup>a</sup> Key Laboratory of Advanced Technologies of Materials, Ministry of Education, Southwest Jiaotong University, Chengdu, Sichuan 610031, P. R. China

<sup>b</sup> Institute of Material Dynamics, Southwest Jiaotong University, Chengdu, Sichuan 610031, P. R. China

<sup>c</sup> School of Physical Science and Technology, Southwest Jiaotong University, Chengdu, Sichuan 610031, P. R. China

<sup>d</sup> The Peac Institute of Multiscale Sciences, Chengdu, Sichuan 610031, P. R. China

Corresponding author: [hbning@swjtu.edu.cn](mailto:hbning@swjtu.edu.cn) (Hongbo Ning); [jcshi@pims.ac.cn](mailto:jcshi@pims.ac.cn) (Jinchun Shi)

Table S1: Optimized geometries and frequencies for involved species based on the ground structures captured by MS-T program at M06-2X/cc-pVTZ level.

| Methyl Pentanoate |             |             |             |                               |           |           |           |           |
|-------------------|-------------|-------------|-------------|-------------------------------|-----------|-----------|-----------|-----------|
| Geometry          |             |             |             | Frequency (cm <sup>-1</sup> ) |           |           |           |           |
| C                 | 3.44090800  | -0.64698100 | -0.14916400 | 39.2436                       | 72.0177   | 105.8732  | 164.9962  | 181.0096  |
| H                 | 3.87731100  | -1.32818900 | -0.87863700 | 223.4350                      | 250.4534  | 263.2468  | 315.9504  | 377.7266  |
| H                 | 4.10651800  | 0.21231200  | -0.05233100 | 530.5945                      | 594.0244  | 663.7261  | 752.2912  | 853.0338  |
| H                 | 3.41654300  | -1.15818100 | 0.81397800  | 859.7312                      | 930.1622  | 956.4134  | 1028.3396 | 1067.9047 |
| C                 | 2.04148000  | -0.20816800 | -0.55920900 | 1083.6485                     | 1129.4087 | 1149.0248 | 1191.6854 | 1219.4409 |
| H                 | 2.07771400  | 0.27525100  | -1.53948300 | 1236.9729                     | 1259.2313 | 1284.1796 | 1332.2579 | 1337.4559 |
| H                 | 1.39592300  | -1.08232400 | -0.65876700 | 1406.2787                     | 1412.1784 | 1413.7750 | 1464.1740 | 1483.1322 |
| C                 | 1.42361100  | 0.75400000  | 0.44922600  | 1488.1478                     | 1496.2654 | 1496.5642 | 1504.9256 | 1510.4822 |
| H                 | 1.38788600  | 0.27488600  | 1.42938000  | 1512.2731                     | 1850.2143 | 3050.0003 | 3057.8964 | 3063.5918 |
| H                 | 2.06111600  | 1.63561800  | 0.54509800  | 3072.5976                     | 3081.7620 | 3092.8864 | 3107.0269 | 3115.8407 |
| C                 | 0.02136400  | 1.19931500  | 0.06434800  | 3128.7604                     | 3135.4647 | 3154.7377 | 3188.6622 |           |
| H                 | -0.01599300 | 1.57862300  | -0.95847000 |                               |           |           |           |           |
| H                 | -0.32804500 | 2.01490200  | 0.70188100  |                               |           |           |           |           |
| C                 | -0.99847300 | 0.09598400  | 0.19149800  |                               |           |           |           |           |
| O                 | -0.82641500 | -0.95753100 | 0.74253000  |                               |           |           |           |           |
| O                 | -2.16492700 | 0.44218700  | -0.37431300 |                               |           |           |           |           |
| C                 | -3.20387000 | -0.52907700 | -0.26608800 |                               |           |           |           |           |
| H                 | -3.42521500 | -0.73279600 | 0.77985300  |                               |           |           |           |           |
| H                 | -4.06740300 | -0.09991800 | -0.76325100 |                               |           |           |           |           |
| H                 | -2.90574200 | -1.45787600 | -0.74865300 |                               |           |           |           |           |

  

| OH       |          |          |           |                               |
|----------|----------|----------|-----------|-------------------------------|
| Geometry |          |          |           | Frequency (cm <sup>-1</sup> ) |
| O        | 0.000000 | 0.000000 | 0.106747  | 3774.5169                     |
| H        | 0.000000 | 0.000000 | -0.864787 |                               |

  
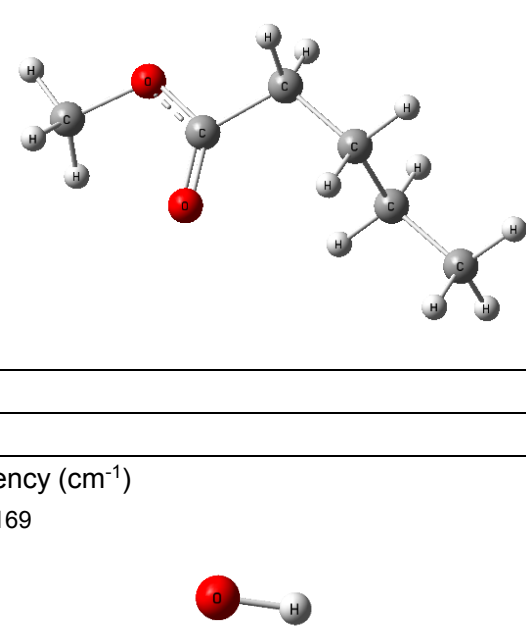

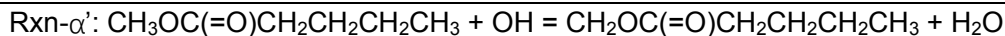

RC- $\alpha'$

| Geometry |           |           |           | Frequency (cm <sup>-1</sup> ) |           |           |           |           |
|----------|-----------|-----------|-----------|-------------------------------|-----------|-----------|-----------|-----------|
| C        | -2.333786 | 1.284949  | 0.361229  | 22.5954                       | 48.6842   | 63.2573   | 88.0163   | 128.8544  |
| H        | -2.408006 | 2.361399  | 0.214075  | 167.7881                      | 169.0499  | 183.0520  | 217.0919  | 270.0832  |
| H        | -3.334755 | 0.903863  | 0.573768  | 315.8331                      | 348.7694  | 373.9887  | 428.1419  | 438.9867  |
| H        | -1.714247 | 1.116682  | 1.242639  | 479.5215                      | 635.3838  | 729.5122  | 773.9205  | 842.2096  |
| C        | -1.741982 | 0.609419  | -0.870778 | 867.3011                      | 916.7372  | 965.5103  | 986.7721  | 1054.1379 |
| H        | -2.312750 | 0.893871  | -1.756042 | 1097.2889                     | 1121.5704 | 1140.3271 | 1185.5082 | 1201.0064 |
| H        | -0.726774 | 0.984303  | -1.031335 | 1226.0384                     | 1256.8268 | 1310.6078 | 1330.5550 | 1357.4805 |
| C        | -1.720485 | -0.915872 | -0.781188 | 1381.9439                     | 1397.0386 | 1419.1194 | 1479.5987 | 1483.5096 |
| H        | -2.741787 | -1.297942 | -0.727401 | 1494.4606                     | 1496.3190 | 1499.7709 | 1506.4916 | 1510.8837 |
| H        | -1.269339 | -1.327156 | -1.684363 | 1520.1913                     | 1814.1676 | 3052.6617 | 3059.6702 | 3068.3605 |
| C        | -0.951647 | -1.446111 | 0.439361  | 3070.2545                     | 3095.4267 | 3099.4974 | 3114.6790 | 3126.9960 |
| H        | -0.827412 | -2.525710 | 0.358364  | 3140.0549                     | 3150.2298 | 3160.0120 | 3191.7869 | 3658.0429 |
| H        | -1.472627 | -1.220098 | 1.366302  |                               |           |           |           |           |
| C        | 0.401781  | -0.801916 | 0.519303  |                               |           |           |           |           |
| O        | 0.745839  | -0.017598 | 1.372657  |                               |           |           |           |           |
| O        | 1.185994  | -1.155618 | -0.498728 |                               |           |           |           |           |
| C        | 2.459796  | -0.510199 | -0.566993 |                               |           |           |           |           |
| H        | 2.995227  | -0.996512 | -1.375147 |                               |           |           |           |           |
| H        | 2.331932  | 0.550224  | -0.785856 |                               |           |           |           |           |
| H        | 2.993082  | -0.623156 | 0.374054  |                               |           |           |           |           |
| O        | 1.296175  | 2.449899  | 0.145145  |                               |           |           |           |           |
| H        | 1.076723  | 1.801888  | 0.844153  |                               |           |           |           |           |

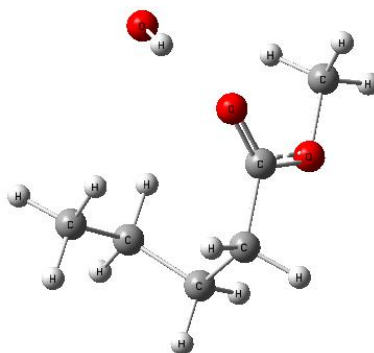

TS- $\alpha'$

| Geometry |           |           |           | Frequency (cm <sup>-1</sup> ) |           |           |           |           |
|----------|-----------|-----------|-----------|-------------------------------|-----------|-----------|-----------|-----------|
| C        | -2.427482 | 1.204474  | 0.459671  | <b>-1156.0774</b>             |           |           |           |           |
| H        | -2.573922 | 2.280809  | 0.381526  | 37.1229                       | 62.1053   | 100.0770  | 148.4333  | 151.8872  |
| H        | -3.405913 | 0.743432  | 0.609679  | 175.5849                      | 216.8918  | 273.1895  | 307.8471  | 348.2526  |
| H        | -1.826004 | 1.019139  | 1.350029  | 350.5895                      | 415.8842  | 435.4896  | 479.5419  | 628.5548  |
| C        | -1.751742 | 0.654460  | -0.791961 | 725.3921                      | 770.7031  | 797.8877  | 842.4628  | 876.7607  |
| H        | -2.304468 | 0.971180  | -1.677694 | 913.1314                      | 929.7739  | 965.5294  | 987.8531  | 1069.2873 |
| H        | -0.751182 | 1.086861  | -0.887660 | 1103.4501                     | 1128.6597 | 1150.6249 | 1163.7485 | 1206.3811 |
| C        | -1.653424 | -0.870228 | -0.806968 | 1252.4670                     | 1258.5982 | 1303.1814 | 1323.7508 | 1355.0966 |
| H        | -2.654633 | -1.305569 | -0.816313 | 1370.9720                     | 1382.6647 | 1398.6058 | 1419.7678 | 1472.0661 |
| H        | -1.151741 | -1.194798 | -1.718692 | 1478.9216                     | 1492.9200 | 1501.0492 | 1511.7867 | 1521.1615 |
| C        | -0.900004 | -1.444455 | 0.402818  | 1521.6112                     | 1837.6794 | 3050.8511 | 3059.1529 | 3068.2190 |
| H        | -0.729701 | -2.511638 | 0.260555  | 3094.9981                     | 3097.8837 | 3112.2841 | 3115.0491 | 3127.0036 |
| H        | -1.456422 | -1.297700 | 1.325087  | 3139.8303                     | 3159.7251 | 3207.9961 | 3744.5431 |           |
| C        | 0.423953  | -0.759370 | 0.568493  |                               |           |           |           |           |
| O        | 0.732111  | -0.028619 | 1.473744  |                               |           |           |           |           |
| O        | 1.247701  | -1.016084 | -0.466546 |                               |           |           |           |           |
| C        | 2.483117  | -0.349136 | -0.450860 |                               |           |           |           |           |
| H        | 3.032837  | -0.645595 | -1.337396 |                               |           |           |           |           |
| H        | 2.287781  | 0.820227  | -0.528567 |                               |           |           |           |           |
| H        | 3.026711  | -0.507655 | 0.477464  |                               |           |           |           |           |
| O        | 1.776078  | 2.054322  | -0.295820 |                               |           |           |           |           |
| H        | 1.413028  | 1.849885  | 0.583799  |                               |           |           |           |           |

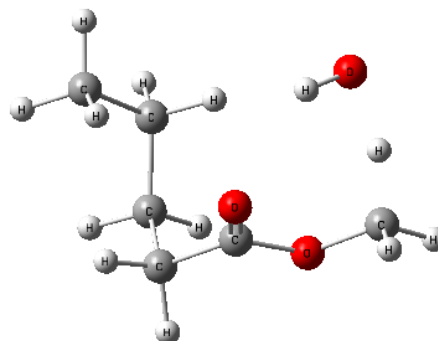

| PC- $\alpha'$ |           |           |           | Frequency (cm <sup>-1</sup> ) |           |           |           |           |
|---------------|-----------|-----------|-----------|-------------------------------|-----------|-----------|-----------|-----------|
| Geometry      |           |           |           |                               |           |           |           |           |
| C             | -2.342584 | 1.049725  | 0.395476  | 34.4972                       | 71.0684   | 72.1088   | 97.5434   | 138.1688  |
| H             | -2.540971 | 2.102346  | 0.201267  | 162.2967                      | 176.4005  | 192.8119  | 214.3319  | 233.0626  |
| H             | -3.282520 | 0.572572  | 0.681235  | 272.9649                      | 309.8222  | 327.5310  | 357.5757  | 430.7046  |
| H             | -1.665394 | .001891   | 1.249257  | 434.8301                      | 487.7337  | 578.0668  | 629.2224  | 713.0092  |
| C             | -1.736299 | 0.381174  | -0.833141 | 771.4404                      | 841.6968  | 845.2178  | 907.9610  | 962.7068  |
| H             | -2.375129 | 0.555756  | -1.700291 | 988.0944                      | 1075.7619 | 1105.8259 | 1130.6111 | 1179.0593 |
| H             | -0.778763 | 0.858845  | -1.055373 | 1205.1854                     | 1238.6965 | 1259.4312 | 1294.9547 | 1320.3946 |
| C             | -1.540593 | -1.125635 | -0.675775 | 1355.5936                     | 1382.0872 | 1393.9737 | 1421.6770 | 1465.0590 |
| H             | -2.509310 | -1.618781 | -0.573189 | 1476.2173                     | 1493.8814 | 1499.1903 | 1510.6515 | 1518.3157 |
| H             | -1.068242 | -1.529220 | -1.571527 | 1637.0185                     | 1843.7982 | 3054.9931 | 3066.4129 | 3068.4278 |
| C             | -0.693945 | -1.504928 | 0.547522  | 3090.4112                     | 3099.6201 | 3114.4906 | 3126.3493 | 3142.1226 |
| H             | -0.459614 | -2.570080 | 0.520585  | 3158.5262                     | 3188.7998 | 3336.4855 | 3831.3342 | 3925.4247 |
| H             | -1.215626 | -1.289860 | 1.476619  |                               |           |           |           |           |
| C             | 0.594302  | -0.740426 | 0.586450  |                               |           |           |           |           |
| O             | 0.950445  | 0.014960  | 1.449299  |                               |           |           |           |           |
| O             | 1.347798  | -0.983448 | -0.520112 |                               |           |           |           |           |
| C             | 2.547970  | -0.349683 | -0.629730 |                               |           |           |           |           |
| H             | 3.105947  | -0.648048 | -1.499384 |                               |           |           |           |           |
| H             | 1.650636  | 2.125835  | -0.771839 |                               |           |           |           |           |
| H             | 2.994154  | 0.041650  | 0.269462  |                               |           |           |           |           |
| O             | 0.971932  | 2.492832  | -0.199344 |                               |           |           |           |           |
| H             | 1.010330  | 1.940988  | 0.589621  |                               |           |           |           |           |

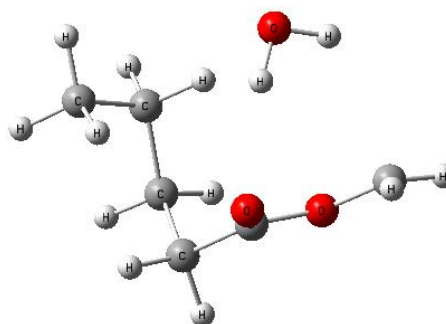

| MP- $\alpha'$ |           |           |           | Frequency (cm <sup>-1</sup> ) |           |           |           |           |
|---------------|-----------|-----------|-----------|-------------------------------|-----------|-----------|-----------|-----------|
| Geometry      |           |           |           |                               |           |           |           |           |
| C             | 3.403325  | -0.601150 | -0.181791 | 37.4651                       | 71.9548   | 103.8816  | 163.5338  | 225.6197  |
| H             | 3.848281  | -1.250023 | -0.935048 | 246.9817                      | 259.9455  | 270.8871  | 317.9135  | 361.8669  |
| H             | 4.052105  | 0.267959  | -0.061797 | 395.5725                      | 534.0469  | 583.8791  | 659.8429  | 749.9702  |
| H             | 3.395365  | -1.142899 | 0.764746  | 845.3057                      | 849.8232  | 921.1882  | 952.7965  | 1036.6345 |
| C             | 1.992949  | -0.178119 | -0.570262 | 1081.6880                     | 1111.7455 | 1127.2686 | 1170.0441 | 1201.4728 |
| H             | 2.013640  | 0.336656  | -1.534816 | 1236.8855                     | 1271.6701 | 1279.6766 | 1331.7318 | 1336.1849 |
| H             | 1.364823  | -1.061773 | -0.694848 | 1401.3479                     | 1410.3291 | 1413.7224 | 1460.0672 | 1463.5060 |
| C             | 1.362733  | 0.739598  | 0.471539  | 1484.3060                     | 1496.4817 | 1503.8731 | 1510.4776 | 1863.4850 |
| H             | 1.342586  | 0.230717  | 1.437021  | 3050.2781                     | 3058.6180 | 3064.9330 | 3070.7853 | 3092.5933 |
| H             | 1.982497  | 1.630671  | 0.591236  | 3105.8972                     | 3115.3022 | 3129.1186 | 3136.7546 | 3204.8852 |
| C             | -0.050062 | 1.169655  | 0.108020  | 3357.1458                     |           |           |           |           |
| H             | -0.101036 | 1.580034  | -0.902268 |                               |           |           |           |           |
| H             | -0.412641 | 1.957865  | 0.772654  |                               |           |           |           |           |
| C             | -1.042700 | 0.043753  | 0.206050  |                               |           |           |           |           |
| O             | -0.861300 | -1.023630 | 0.715940  |                               |           |           |           |           |
| O             | -2.231692 | 0.401291  | -0.352285 |                               |           |           |           |           |
| C             | -3.261131 | -0.488734 | -0.289410 |                               |           |           |           |           |
| H             | -4.122043 | -0.192908 | -0.859820 |                               |           |           |           |           |
| H             | -3.050318 | -1.487603 | 0.048828  |                               |           |           |           |           |

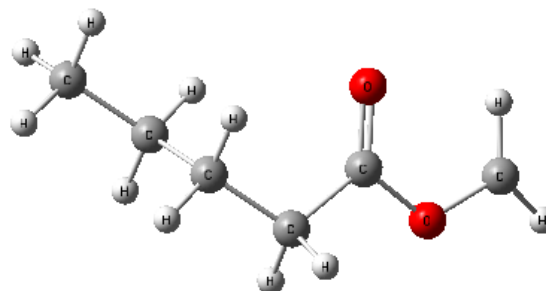

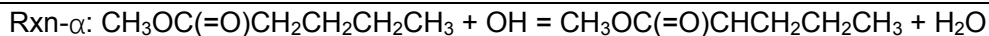

RC- $\alpha$

Geometry

|   |           |           |           |
|---|-----------|-----------|-----------|
| C | -3.091306 | -1.235638 | -0.558195 |
| H | -3.562138 | -1.060563 | -1.524299 |
| H | -2.788980 | -2.283148 | -0.515913 |
| H | -3.843782 | -1.076335 | 0.215403  |
| C | -1.895666 | -0.315827 | -0.348297 |
| H | -1.168926 | -0.469258 | -1.150263 |
| H | -2.212403 | 0.728272  | -0.419973 |
| C | -1.231722 | -0.544389 | 1.004865  |
| H | -1.962015 | -0.374424 | 1.798150  |
| H | -0.909003 | -1.584748 | 1.092195  |
| C | -0.031653 | 0.379992  | 1.257830  |
| H | 0.355689  | 0.222625  | 2.263119  |
| H | -0.329619 | 1.420523  | 1.138623  |
| C | 1.065466  | 0.097590  | 0.272826  |
| O | 1.272671  | 0.717450  | -0.745663 |
| O | 1.790056  | -0.967399 | 0.615685  |
| C | 2.818318  | -1.339662 | -0.304362 |
| H | 3.531079  | -0.526110 | -0.420687 |
| H | 3.297953  | -2.212550 | 0.124736  |
| H | 2.387441  | -1.574608 | -1.275384 |
| O | -0.850783 | 2.549145  | -1.135303 |
| H | -0.040021 | 1.994889  | -1.137083 |

Frequency ( $\text{cm}^{-1}$ )

|           |           |           |           |           |
|-----------|-----------|-----------|-----------|-----------|
| 29.7847   | 59.2398   | 84.3460   | 86.3341   | 107.8355  |
| 155.6493  | 160.5102  | 174.9668  | 219.7588  | 248.2622  |
| 277.9548  | 330.2002  | 444.3248  | 459.3203  | 491.6703  |
| 608.2469  | 642.9441  | 733.3198  | 784.8590  | 853.7582  |
| 870.7554  | 916.6293  | 965.9299  | 1021.9763 | 1058.7449 |
| 1086.2990 | 1129.5545 | 1142.1944 | 1191.7378 | 1221.9090 |
| 1229.9944 | 1262.6930 | 1314.5791 | 1334.1770 | 1352.8882 |
| 1373.6352 | 1412.2303 | 1414.8970 | 1484.3715 | 1489.4363 |
| 1496.0574 | 1497.8729 | 1501.7924 | 1504.8256 | 1509.5384 |
| 1513.6021 | 1810.8701 | 3046.8231 | 3058.4958 | 3063.1970 |
| 3076.7690 | 3085.7469 | 3094.8005 | 3107.5131 | 3125.9156 |
| 3139.9203 | 3153.4974 | 3160.8631 | 3195.6947 | 3568.3502 |

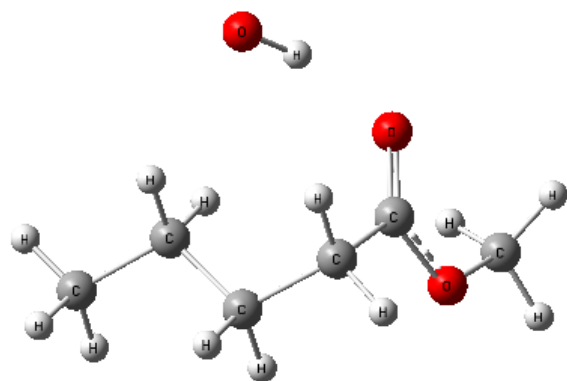

TS- $\alpha$

Geometry

|   |           |           |           |
|---|-----------|-----------|-----------|
| C | -2.954861 | -1.419750 | -0.497435 |
| H | -3.301468 | -1.590182 | -1.515648 |
| H | -2.730702 | -2.390141 | -0.051958 |
| H | -3.777343 | -0.977615 | 0.066273  |
| C | -1.732736 | -0.512472 | -0.470649 |
| H | -0.931383 | -0.959269 | -1.066572 |
| H | -1.961423 | 0.450869  | -0.930375 |
| C | -1.231079 | -0.270872 | 0.948762  |
| H | -2.036520 | 0.137912  | 1.561568  |
| H | -0.935211 | -1.220950 | 1.404750  |
| C | -0.050628 | 0.681682  | 1.001126  |
| H | 0.301394  | 0.877935  | 2.013480  |
| H | -0.410375 | 1.743995  | 0.574429  |
| C | 1.093220  | 0.266186  | 0.118748  |
| O | 1.499879  | 0.878006  | -0.835907 |
| O | 1.611100  | -0.902683 | 0.508157  |
| C | 2.686870  | -1.394075 | -0.294523 |
| H | 3.514098  | -0.687554 | -0.288548 |
| H | 2.983146  | -2.337288 | 0.151349  |
| H | 2.353101  | -1.539811 | -1.319930 |
| O | -0.616496 | 2.758039  | -0.245512 |
| H | 0.112614  | 2.525282  | -0.847957 |

Frequency ( $\text{cm}^{-1}$ )

|                   |           |           |           |           |
|-------------------|-----------|-----------|-----------|-----------|
| <b>-1238.7492</b> |           |           |           |           |
| 29.9537           | 70.5836   | 80.8715   | 95.2668   | 149.1382  |
| 162.3947          | 178.4794  | 207.9718  | 249.2102  | 274.6268  |
| 306.2823          | 396.5906  | 420.2997  | 477.5732  | 627.7462  |
| 691.0547          | 738.6128  | 781.7744  | 852.6565  | 867.5017  |
| 909.9529          | 937.5753  | 971.3542  | 1035.5404 | 1062.5854 |
| 1085.0902         | 1134.4737 | 1154.5771 | 1190.1427 | 1212.5500 |
| 1226.5808         | 1263.2753 | 1276.7927 | 1307.1191 | 1337.6633 |
| 1367.4804         | 1408.0312 | 1416.2924 | 1476.2915 | 1486.9160 |
| 1488.7920         | 1496.1920 | 1497.2783 | 1505.0282 | 1509.4129 |
| 1512.1351         | 1829.0291 | 3044.3217 | 3050.2363 | 3059.9996 |
| 3084.9938         | 3089.5641 | 3104.8537 | 3120.0066 | 3128.1896 |
| 3139.5142         | 3160.1354 | 3195.3550 | 3731.3616 |           |

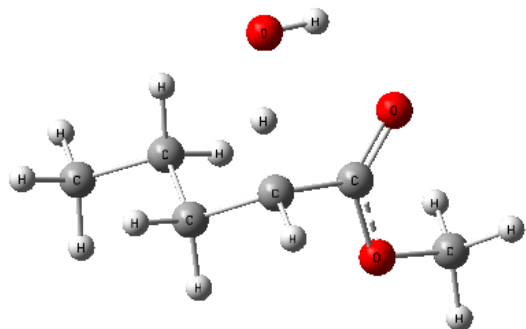

| PC- $\alpha$ |           |           |           | Frequency (cm <sup>-1</sup> ) |           |           |           |           |
|--------------|-----------|-----------|-----------|-------------------------------|-----------|-----------|-----------|-----------|
| Geometry     |           |           |           |                               |           |           |           |           |
| C            | -3.132998 | -2.088074 | -0.120202 | 29.4738                       | 50.3408   | 79.3848   | 80.7495   | 97.7688   |
| H            | -3.611513 | -2.475506 | -1.018681 | 130.1185                      | 156.6963  | 162.7414  | 183.4009  | 225.6486  |
| H            | -2.662057 | -2.924250 | 0.398017  | 249.2116                      | 285.2444  | 314.6268  | 337.4029  | 385.0028  |
| H            | -3.912491 | -1.689344 | 0.530230  | 566.6862                      | 620.1822  | 632.0030  | 651.6098  | 753.5301  |
| C            | -2.107313 | -1.015596 | -0.459535 | 780.9224                      | 869.7855  | 896.6739  | 905.3883  | 1044.1292 |
| H            | -1.339868 | -1.422041 | -1.120025 | 1059.2431                     | 1094.8150 | 1141.2795 | 1161.1997 | 1190.4969 |
| H            | -2.584390 | -0.192184 | -0.993883 | 1226.9975                     | 1262.3662 | 1295.4830 | 1329.3592 | 1342.3187 |
| C            | -1.422678 | -0.465558 | 0.806381  | 1366.4616                     | 1412.3570 | 1426.4978 | 1485.0481 | 1492.3381 |
| H            | -2.186700 | -0.064121 | 1.473836  | 1495.6165                     | 1496.3883 | 1502.8404 | 1509.7192 | 1511.0252 |
| H            | -0.930226 | -1.295563 | 1.316685  | 1649.2226                     | 1734.5452 | 3060.4087 | 3062.0307 | 3073.5360 |
| C            | -0.435906 | 0.591717  | 0.484009  | 3080.7513                     | 3098.6256 | 3117.5404 | 3134.4290 | 3138.7547 |
| H            | -0.697669 | 1.640889  | 0.495621  | 3153.5565                     | 3188.3214 | 3217.4930 | 3736.3689 | 3939.8338 |
| H            | 0.822404  | 4.179670  | 0.639232  |                               |           |           |           |           |
| C            | 0.910026  | 0.306223  | 0.045667  |                               |           |           |           |           |
| O            | 1.731707  | 1.152131  | -0.265710 |                               |           |           |           |           |
| O            | 1.194415  | -1.008042 | 0.008173  |                               |           |           |           |           |
| C            | 2.514499  | -1.331913 | -0.420040 |                               |           |           |           |           |
| H            | 3.249817  | -0.890589 | 0.250159  |                               |           |           |           |           |
| H            | 2.577775  | -2.414764 | -0.397031 |                               |           |           |           |           |
| H            | 2.689007  | -0.958319 | -1.427275 |                               |           |           |           |           |
| O            | 0.397797  | 3.671384  | -0.053639 |                               |           |           |           |           |
| H            | 0.999916  | 2.932397  | -0.225598 |                               |           |           |           |           |

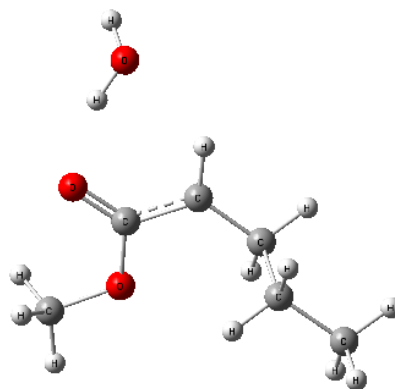

| MP- $\alpha$ |           |           |           | Frequency (cm <sup>-1</sup> ) |           |           |           |           |
|--------------|-----------|-----------|-----------|-------------------------------|-----------|-----------|-----------|-----------|
| Geometry     |           |           |           |                               |           |           |           |           |
| C            | 2.195061  | -1.352047 | 0.352991  | 43.2784                       | 58.5550   | 109.9455  | 153.8824  | 178.9668  |
| H            | 2.986675  | -1.960199 | 0.788872  | 212.7802                      | 259.3145  | 314.7604  | 349.4122  | 402.3312  |
| H            | 1.307144  | -1.460760 | 0.977210  | 478.0693                      | 586.7824  | 684.6796  | 758.4467  | 791.7762  |
| H            | 1.951751  | -1.755085 | -0.630525 | 848.0584                      | 888.5425  | 955.0298  | 1012.2602 | 1072.3919 |
| C            | 2.617690  | 0.107667  | 0.248692  | 1086.9477                     | 1102.9352 | 1176.5922 | 1190.5400 | 1217.5615 |
| H            | 2.808725  | 0.514743  | 1.244098  | 1235.8284                     | 1263.2789 | 1282.8965 | 1351.4508 | 1372.1735 |
| H            | 3.551835  | 0.187552  | -0.309162 | 1421.4793                     | 1452.1116 | 1481.4132 | 1490.6333 | 1494.2374 |
| C            | 1.560197  | 0.975538  | -0.461318 | 1498.8885                     | 1503.5823 | 1508.3784 | 1512.7331 | 1761.2861 |
| H            | 1.944548  | 1.994238  | -0.552350 | 3056.9966                     | 3061.1848 | 3062.9716 | 3077.5756 | 3097.8793 |
| H            | 1.390168  | 0.581503  | -1.463745 | 3120.9179                     | 3131.9934 | 3139.3542 | 3148.2175 | 3185.4685 |
| C            | 0.272245  | 0.998608  | 0.267712  | 3215.4859                     |           |           |           |           |
| H            | 0.160140  | 1.559898  | 1.184659  |                               |           |           |           |           |
| C            | -0.856413 | 0.212968  | -0.184703 |                               |           |           |           |           |
| O            | -0.858459 | -0.497303 | -1.166601 |                               |           |           |           |           |
| O            | -1.930024 | 0.351652  | 0.621014  |                               |           |           |           |           |
| C            | -3.073229 | -0.400221 | 0.228510  |                               |           |           |           |           |
| H            | -2.844085 | -1.464574 | 0.217351  |                               |           |           |           |           |
| H            | -3.841350 | -0.183079 | 0.963587  |                               |           |           |           |           |
| H            | -3.400994 | -0.104097 | -0.766595 |                               |           |           |           |           |

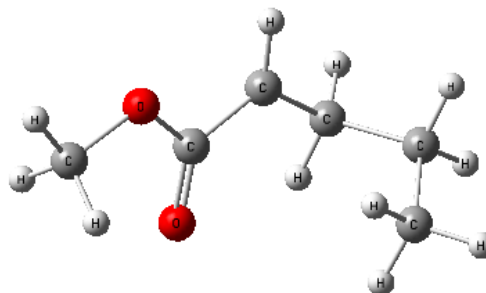

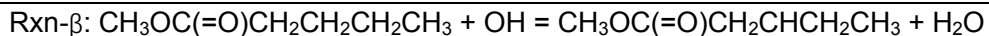

RC-β

Geometry

|   |           |           |           |
|---|-----------|-----------|-----------|
| C | -3.299381 | -0.514777 | -0.544737 |
| H | -3.708566 | -0.761029 | -1.523568 |
| H | -3.896538 | -1.029842 | 0.209630  |
| H | -3.414564 | 0.558918  | -0.393931 |
| C | -1.833322 | -0.914155 | -0.439777 |
| H | -1.724522 | -1.986714 | -0.624067 |
| H | -1.260603 | -0.402896 | -1.216895 |
| C | -1.248016 | -0.585303 | 0.930312  |
| H | -1.357291 | 0.482952  | 1.128599  |
| H | -1.823965 | -1.105810 | 1.698199  |
| C | 0.212830  | -0.985439 | 1.071272  |
| H | 0.373140  | -2.029897 | 0.798112  |
| H | 0.554431  | -0.888814 | 2.104931  |
| C | 1.151275  | -0.146531 | 0.246218  |
| O | 0.877765  | 0.898276  | -0.295139 |
| O | 2.372817  | -0.676168 | 0.193071  |
| C | 3.343585  | 0.076760  | -0.537304 |
| H | 3.471411  | 1.060463  | -0.090515 |
| H | 4.264341  | -0.493311 | -0.480302 |
| H | 3.027325  | 0.195420  | -1.571390 |
| O | -1.606386 | 2.202226  | -0.781099 |
| H | -0.716947 | 1.822755  | -0.619488 |

Frequency (cm<sup>-1</sup>)

|           |           |           |           |           |
|-----------|-----------|-----------|-----------|-----------|
| 39.6061   | 48.7521   | 95.8407   | 112.7883  | 128.7198  |
| 153.4229  | 166.8982  | 180.3367  | 229.0880  | 252.2562  |
| 267.7180  | 324.4699  | 382.5040  | 449.9824  | 531.7381  |
| 558.7880  | 593.6274  | 670.6792  | 759.8534  | 852.0261  |
| 865.5811  | 935.9487  | 956.1691  | 1025.7795 | 1065.4854 |
| 1084.8041 | 1130.6237 | 1147.7484 | 1190.8681 | 1221.2432 |
| 1241.1214 | 1266.9077 | 1290.8039 | 1330.2238 | 1335.9627 |
| 1405.8751 | 1415.7874 | 1416.1518 | 1459.9056 | 1490.9624 |
| 1492.6762 | 1495.3025 | 1496.9130 | 1501.5095 | 1509.5708 |
| 1512.6281 | 1818.9084 | 3047.6218 | 3058.3586 | 3065.0506 |
| 3071.4013 | 3083.3081 | 3085.6176 | 3105.7934 | 3115.3387 |
| 3129.4030 | 3138.9758 | 3160.8706 | 3195.6454 | 3606.1044 |

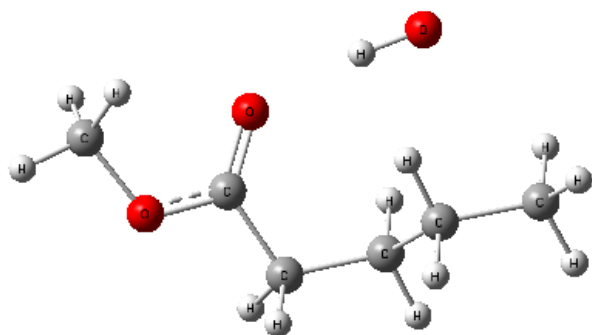

TS-β

Geometry

|   |           |           |           |
|---|-----------|-----------|-----------|
| C | -3.213381 | -0.620593 | -0.757242 |
| H | -3.552176 | -1.070855 | -1.689095 |
| H | -3.858707 | -0.981314 | 0.045087  |
| H | -3.337248 | 0.459741  | -0.829168 |
| C | -1.755625 | -0.959153 | -0.474451 |
| H | -1.626672 | -2.044841 | -0.404697 |
| H | -1.129097 | -0.619283 | -1.301137 |
| C | -1.267895 | -0.326479 | 0.812758  |
| H | -1.437065 | 0.836693  | 0.718694  |
| H | -1.907093 | -0.593643 | 1.656277  |
| C | 0.185091  | -0.579077 | 1.153568  |
| H | 0.385478  | -1.647976 | 1.256123  |
| H | 0.444745  | -0.125822 | 2.113299  |
| C | 1.163574  | -0.022616 | 0.149222  |
| O | 0.936750  | 0.847496  | -0.654037 |
| O | 2.362528  | -0.596715 | 0.267990  |
| C | 3.375782  | -0.090790 | -0.603205 |
| H | 3.531976  | 0.970758  | -0.423018 |
| H | 4.272900  | -0.655317 | -0.373775 |
| H | 3.085265  | -0.234501 | -1.641717 |
| O | -1.441976 | 2.155774  | 0.315883  |
| H | -0.656004 | 2.046170  | -0.249457 |

Frequency (cm<sup>-1</sup>)

|                  |           |           |           |           |
|------------------|-----------|-----------|-----------|-----------|
| <b>-918.6851</b> |           |           |           |           |
| 31.6934          | 76.2116   | 92.3415   | 122.6832  | 159.6501  |
| 161.2607         | 181.1002  | 206.9419  | 255.8729  | 272.3068  |
| 315.4433         | 384.7896  | 461.4528  | 532.9190  | 591.6846  |
| 630.3649         | 734.7834  | 822.6475  | 854.7325  | 922.0452  |
| 940.9725         | 953.8116  | 1028.9837 | 1064.6087 | 1066.5781 |
| 1104.6766        | 1138.0160 | 1148.6321 | 1190.6058 | 1220.1200 |
| 1230.5908        | 1258.1401 | 1274.9105 | 1306.1696 | 1320.5961 |
| 1399.0776        | 1409.1729 | 1416.0634 | 1449.7115 | 1453.3780 |
| 1488.7108        | 1489.8232 | 1496.4493 | 1504.3704 | 1509.1803 |
| 1513.1452        | 1829.1102 | 3034.2815 | 3062.2976 | 3068.1181 |
| 3084.7146        | 3085.0890 | 3101.0090 | 3106.3647 | 3132.6586 |
| 3145.3936        | 3159.4547 | 3194.7754 | 3720.6612 |           |

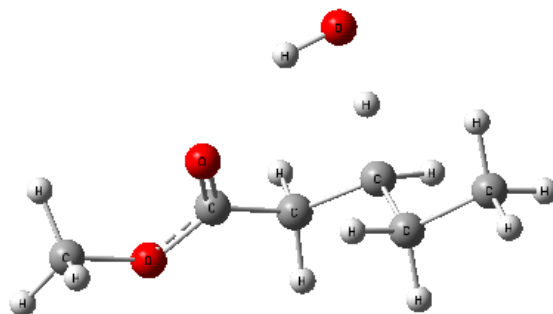

| PC- $\beta$ |           |           |           | Frequency (cm <sup>-1</sup> ) |           |           |           |           |
|-------------|-----------|-----------|-----------|-------------------------------|-----------|-----------|-----------|-----------|
| Geometry    |           |           |           |                               |           |           |           |           |
| C           | -3.388604 | -0.520158 | -0.388987 | 33.1396                       | 46.8650   | 81.4243   | 102.0194  | 119.1966  |
| H           | -3.942990 | -0.503416 | -1.326484 | 136.9058                      | 151.4048  | 155.9504  | 174.0860  | 217.1665  |
| H           | -3.827653 | -1.285255 | 0.252210  | 254.7040                      | 260.3779  | 297.1380  | 315.5263  | 377.0631  |
| H           | -3.500708 | 0.449034  | 0.095019  | 450.8208                      | 540.8200  | 548.7037  | 589.2364  | 705.8460  |
| C           | -1.909669 | -0.798346 | -0.626736 | 775.7207                      | 859.2349  | 915.7470  | 961.5036  | 1043.5945 |
| H           | -1.775215 | -1.740475 | -1.171165 | 1059.2973                     | 1074.4774 | 1122.4273 | 1170.2588 | 1190.5327 |
| H           | -1.501490 | -0.014370 | -1.279762 | 1217.5010                     | 1234.2137 | 1262.4201 | 1278.1972 | 1326.4755 |
| C           | -1.123500 | -0.842981 | 0.634624  | 1365.0598                     | 1407.7022 | 1428.0531 | 1453.1291 | 1470.6079 |
| H           | -1.581567 | 3.057699  | -0.097266 | 1486.7556                     | 1496.8013 | 1499.6307 | 1509.7919 | 1514.5123 |
| H           | -1.506398 | -0.329032 | 1.505478  | 1643.3679                     | 1820.1455 | 2994.4707 | 3029.3886 | 3055.7722 |
| C           | 0.302057  | -1.261111 | 0.617563  | 3065.0778                     | 3084.4505 | 3100.2282 | 3133.3765 | 3150.6692 |
| H           | 0.461325  | -2.125069 | -0.034292 | 3159.4288                     | 3193.7405 | 3205.0601 | 3763.7639 | 3939.9022 |
| H           | 0.658392  | -1.556192 | 1.607058  |                               |           |           |           |           |
| C           | 1.249424  | -0.180064 | 0.132654  |                               |           |           |           |           |
| O           | 0.950601  | 0.961540  | -0.116539 |                               |           |           |           |           |
| O           | 2.496313  | -0.639065 | 0.013859  |                               |           |           |           |           |
| C           | 3.467111  | 0.315221  | -0.419802 |                               |           |           |           |           |
| H           | 3.520788  | 1.144027  | 0.283024  |                               |           |           |           |           |
| H           | 4.410997  | -0.217652 | -0.457358 |                               |           |           |           |           |
| H           | 3.203605  | 0.700483  | -1.402581 |                               |           |           |           |           |
| O           | -1.627747 | 2.219468  | 0.365393  |                               |           |           |           |           |
| H           | -0.762126 | 1.809483  | 0.228905  |                               |           |           |           |           |

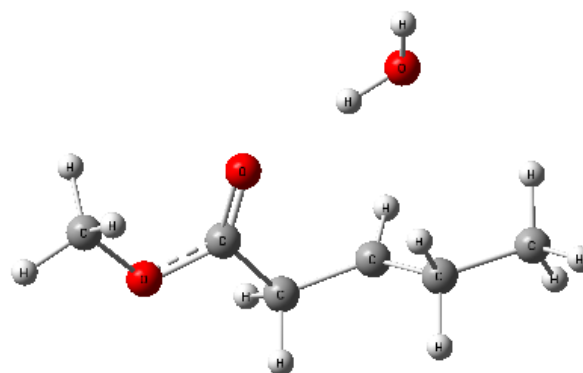

| MP- $\beta$ |           |           |           | Frequency (cm <sup>-1</sup> ) |           |           |           |           |
|-------------|-----------|-----------|-----------|-------------------------------|-----------|-----------|-----------|-----------|
| Geometry    |           |           |           |                               |           |           |           |           |
| C           | -3.830774 | 0.421164  | 0.100608  | 23.1143                       | 50.9010   | 84.9763   | 110.2738  | 154.7441  |
| H           | -4.792143 | -0.089966 | 0.083491  | 175.4948                      | 237.7946  | 261.6728  | 281.2641  | 323.9739  |
| H           | -3.751370 | 0.966424  | 1.041033  | 366.5060                      | 499.6080  | 583.9958  | 711.9429  | 770.6234  |
| H           | -3.820762 | 1.150925  | -0.709251 | 913.3900                      | 923.9613  | 941.1857  | 1046.0200 | 1063.2219 |
| C           | -2.674120 | -0.559885 | -0.049377 | 1073.5907                     | 1145.9305 | 1158.6971 | 1190.4921 | 1197.8974 |
| H           | -2.717954 | -1.312564 | 0.747647  | 1215.8695                     | 1235.2397 | 1274.3312 | 1297.3113 | 1384.9118 |
| H           | -2.796694 | -1.130831 | -0.981001 | 1416.0546                     | 1443.0396 | 1447.4732 | 1477.3990 | 1488.1283 |
| C           | -1.345187 | 0.104254  | -0.035837 | 1496.4553                     | 1503.0993 | 1509.1736 | 1511.4250 | 1858.4755 |
| H           | -1.260201 | 1.176446  | -0.137044 | 2983.9892                     | 2999.9609 | 3016.3845 | 3033.5331 | 3065.3867 |
| C           | -0.105599 | -0.707887 | -0.044390 | 3081.4326                     | 3133.3543 | 3142.3248 | 3154.4125 | 3188.9531 |
| H           | -0.045754 | -1.358506 | -0.928278 | 3220.7629                     |           |           |           |           |
| H           | -0.063752 | -1.401708 | 0.803855  |                               |           |           |           |           |
| C           | 1.157672  | 0.115904  | -0.021753 |                               |           |           |           |           |
| O           | 1.218180  | 1.313282  | -0.061856 |                               |           |           |           |           |
| O           | 2.241696  | -0.672178 | 0.043242  |                               |           |           |           |           |
| C           | 3.491027  | 0.016021  | 0.057860  |                               |           |           |           |           |
| H           | 3.548758  | 0.677782  | 0.919888  |                               |           |           |           |           |
| H           | 4.254802  | -0.752410 | 0.113675  |                               |           |           |           |           |
| H           | 3.607956  | 0.608147  | -0.847768 |                               |           |           |           |           |

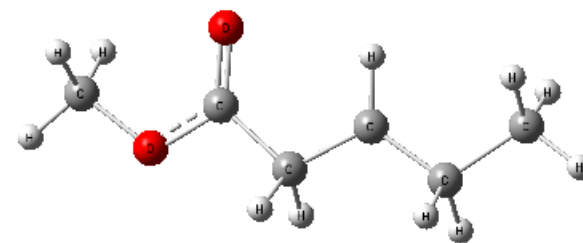



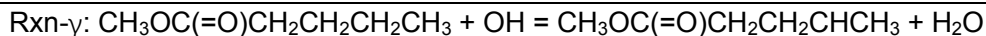

RC- $\gamma$

Geometry

|   |           |           |           |
|---|-----------|-----------|-----------|
| C | 2.447654  | 0.699731  | 0.397933  |
| H | 2.751435  | 1.735207  | 0.254058  |
| H | 1.816052  | 0.668563  | 1.286149  |
| H | 3.341372  | 0.104563  | 0.596000  |
| C | 1.710363  | 0.177326  | -0.830143 |
| H | 0.812919  | 0.781383  | -1.003167 |
| H | 2.331874  | 0.313019  | -1.716543 |
| C | 1.322113  | -1.297406 | -0.733213 |
| H | 0.789789  | -1.593927 | -1.637135 |
| H | 2.222298  | -1.912043 | -0.671815 |
| C | 0.443098  | -1.621280 | 0.485728  |
| H | 1.001029  | -1.527205 | 1.413880  |
| H | 0.059046  | -2.637798 | 0.405150  |
| C | -0.710633 | -0.663767 | 0.559104  |
| O | -0.844986 | 0.194558  | 1.400581  |
| O | -1.562131 | -0.823814 | -0.452554 |
| C | -2.631597 | 0.124590  | -0.522879 |
| H | -2.229821 | 1.127820  | -0.655432 |
| H | -3.227836 | -0.166249 | -1.380788 |
| H | -3.225216 | 0.089193  | 0.388083  |
| O | -0.175109 | 2.666025  | 0.166676  |
| H | -0.445845 | 1.996679  | 0.827289  |

Frequency ( $\text{cm}^{-1}$ )

|           |           |           |           |           |
|-----------|-----------|-----------|-----------|-----------|
| 44.1119   | 66.3588   | 79.9187   | 93.6835   | 132.5167  |
| 168.0629  | 174.8782  | 197.1146  | 218.9185  | 273.1300  |
| 315.4564  | 348.2022  | 420.6259  | 436.0761  | 464.5099  |
| 482.9386  | 636.5746  | 730.4255  | 770.9505  | 842.2506  |
| 866.2613  | 916.1455  | 964.3265  | 986.4639  | 1051.4330 |
| 1096.7660 | 1119.1591 | 1139.9289 | 1192.8969 | 1201.4660 |
| 1228.0373 | 1253.8813 | 1309.6165 | 1330.5916 | 1355.6360 |
| 1381.3224 | 1395.7604 | 1417.6451 | 1476.1084 | 1485.7020 |
| 1494.0065 | 1497.8138 | 1500.1931 | 1506.6765 | 1509.6126 |
| 1516.7272 | 1812.4008 | 3017.3377 | 3058.5061 | 3069.2068 |
| 3081.6549 | 3091.2134 | 3100.2981 | 3114.8989 | 3127.5695 |
| 3143.2168 | 3159.5074 | 3160.9260 | 3193.9368 | 3648.2953 |

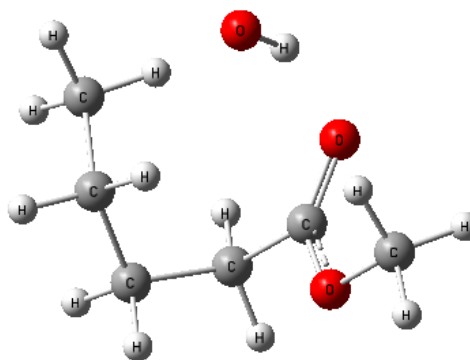

TS- $\gamma$

Geometry

|   |           |           |           |
|---|-----------|-----------|-----------|
| C | 2.571330  | 0.386313  | 0.675869  |
| H | 3.064466  | 1.353131  | 0.757811  |
| H | 1.888434  | 0.285523  | 1.519473  |
| H | 3.334143  | -0.392156 | 0.762065  |
| C | 1.837808  | 0.269223  | -0.645071 |
| H | 1.022800  | 1.101228  | -0.676111 |
| H | 2.477829  | 0.550363  | -1.482481 |
| C | 1.188606  | -1.078131 | -0.919709 |
| H | 0.611342  | -1.025210 | -1.843164 |
| H | 1.977301  | -1.819015 | -1.078534 |
| C | 0.282154  | -1.593717 | 0.207856  |
| H | 0.846421  | -1.748085 | 1.124369  |
| H | -0.169423 | -2.536900 | -0.095700 |
| C | -0.806020 | -0.599340 | 0.501118  |
| O | -0.814571 | 0.157817  | 1.441673  |
| O | -1.751134 | -0.612255 | -0.438121 |
| C | -2.771432 | 0.381658  | -0.313270 |
| H | -2.337567 | 1.368515  | -0.461660 |
| H | -3.494167 | 0.162278  | -1.091807 |
| H | -3.234039 | 0.325444  | 0.669536  |
| O | 0.106897  | 2.188108  | -0.452524 |
| H | -0.137493 | 1.911579  | 0.448879  |

Frequency ( $\text{cm}^{-1}$ )

|                  |           |           |           |           |
|------------------|-----------|-----------|-----------|-----------|
| <b>-721.1528</b> |           |           |           |           |
| 59.6879          | 83.2170   | 104.4979  | 135.3020  | 165.5266  |
| 181.2050         | 194.3068  | 210.6916  | 260.1261  | 321.0122  |
| 335.1580         | 430.5408  | 448.7917  | 474.1634  | 634.2819  |
| 692.3229         | 747.7521  | 837.0286  | 842.7716  | 898.4730  |
| 922.8444         | 963.2685  | 989.8393  | 1056.2037 | 1058.4277 |
| 1101.1366        | 1129.6022 | 1166.0353 | 1191.1283 | 1203.6880 |
| 1227.2693        | 1258.1406 | 1319.7033 | 1345.4346 | 1363.2731 |
| 1388.8123        | 1401.7780 | 1422.5433 | 1461.4440 | 1477.7132 |
| 1480.1225        | 1491.5659 | 1495.0208 | 1497.9235 | 1514.2897 |
| 1516.0060        | 1821.3559 | 3050.2188 | 3053.0764 | 3084.2867 |
| 3093.7375        | 3103.4074 | 3110.9083 | 3121.4575 | 3147.9011 |
| 3161.6182        | 3164.0063 | 3192.3116 | 3731.6416 |           |

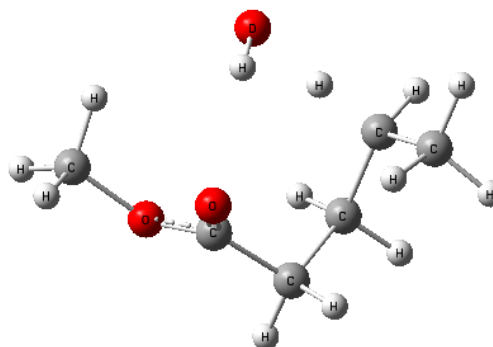



| PC- $\gamma$ |           |           |           | Frequency (cm <sup>-1</sup> ) |           |           |           |           |
|--------------|-----------|-----------|-----------|-------------------------------|-----------|-----------|-----------|-----------|
| Geometry     |           |           |           |                               |           |           |           |           |
| C            | 2.556179  | 0.409328  | 0.517868  | 45.6717                       | 76.6771   | 89.9527   | 103.3853  | 139.2869  |
| H            | 2.952763  | 1.421024  | 0.461372  | 145.6299                      | 154.8037  | 187.5570  | 195.3990  | 210.6239  |
| H            | 1.851997  | 0.372501  | 1.352415  | 246.4766                      | 305.0116  | 312.6944  | 325.4111  | 430.2711  |
| H            | 3.387795  | -0.260437 | 0.774504  | 445.5352                      | 453.6098  | 557.1403  | 633.0652  | 723.0752  |
| C            | 1.915528  | 0.001915  | -0.764131 | 853.2942                      | 864.6773  | 921.9688  | 970.0797  | 997.9180  |
| H            | 0.539499  | 2.022099  | -0.510753 | 1002.5797                     | 1068.5495 | 1127.5824 | 1153.0454 | 1196.3387 |
| H            | 2.221603  | 0.499818  | -1.674922 | 1202.5395                     | 1219.1374 | 1229.5242 | 1322.1720 | 1361.4793 |
| C            | 1.252121  | -1.328268 | -0.906522 | 1379.9058                     | 1393.2228 | 1424.2183 | 1469.2679 | 1479.3492 |
| H            | 0.671451  | -1.358608 | -1.828305 | 1483.3841                     | 1491.8394 | 1499.5842 | 1502.7579 | 1519.6722 |
| H            | 2.011141  | -2.117993 | -0.990838 | 1641.2725                     | 1824.8911 | 2996.1963 | 3000.6753 | 3082.8887 |
| C            | 0.337841  | -1.691391 | 0.274420  | 3083.4757                     | 3101.5268 | 3107.6655 | 3143.4237 | 3160.4861 |
| H            | 0.902171  | -1.778400 | 1.199598  | 3164.8289                     | 3188.3910 | 3191.8603 | 3822.1680 | 3902.2823 |
| H            | -0.155942 | -2.641173 | 0.071951  |                               |           |           |           |           |
| C            | -0.708757 | -0.629228 | 0.478854  |                               |           |           |           |           |
| O            | -0.762606 | 0.113472  | 1.428623  |                               |           |           |           |           |
| O            | -1.565350 | -0.579433 | -0.540597 |                               |           |           |           |           |
| C            | -2.575621 | 0.434148  | -0.464805 |                               |           |           |           |           |
| H            | -2.115529 | 1.419159  | -0.509425 |                               |           |           |           |           |
| H            | -3.220095 | 0.269180  | -1.321586 |                               |           |           |           |           |
| H            | -3.136120 | 0.332312  | 0.462053  |                               |           |           |           |           |
| O            | -0.016715 | 2.599787  | 0.020595  |                               |           |           |           |           |
| H            | -0.255248 | 2.049878  | 0.775781  |                               |           |           |           |           |

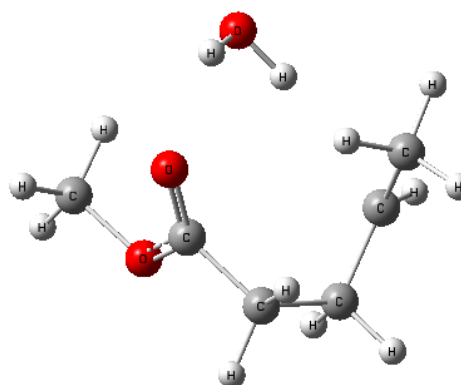

| MP- $\gamma$ |           |           |           | Frequency (cm <sup>-1</sup> ) |           |           |           |           |
|--------------|-----------|-----------|-----------|-------------------------------|-----------|-----------|-----------|-----------|
| Geometry     |           |           |           |                               |           |           |           |           |
| C            | -2.722225 | 1.220839  | -0.146357 | 38.2262                       | 69.5602   | 94.8825   | 108.4192  | 168.3076  |
| H            | -2.992245 | 1.861981  | -0.983457 | 183.2661                      | 201.5637  | 277.3907  | 330.5400  | 372.4944  |
| H            | -3.629390 | 1.058384  | 0.449551  | 401.6579                      | 506.9812  | 599.6119  | 666.0174  | 840.9179  |
| H            | -2.019330 | 1.761421  | 0.493800  | 864.9525                      | 943.4020  | 971.8728  | 990.2135  | 1019.9721 |
| C            | -2.124227 | -0.060926 | -0.598249 | 1076.3602                     | 1130.9126 | 1153.9443 | 1191.6396 | 1216.1440 |
| H            | -2.197451 | -0.358189 | -1.636287 | 1227.3660                     | 1231.6219 | 1273.8808 | 1330.0807 | 1399.0241 |
| C            | -1.528732 | -1.027141 | 0.368117  | 1404.1525                     | 1432.1346 | 1463.4258 | 1475.1297 | 1479.4847 |
| H            | -1.564306 | -0.607604 | 1.374530  | 1487.9714                     | 1492.2194 | 1496.8392 | 1511.8944 | 1847.9591 |
| H            | -2.098507 | -1.962568 | 0.388281  | 3003.7067                     | 3025.2960 | 3065.6075 | 3071.0411 | 3081.8343 |
| C            | -0.078619 | -1.366676 | 0.026155  | 3100.0801                     | 3119.9979 | 3136.2211 | 3154.9610 | 3186.7262 |
| H            | 0.015404  | -1.728556 | -0.998408 | 3188.9709                     |           |           |           |           |
| H            | 0.312738  | -2.157461 | 0.671172  |                               |           |           |           |           |
| C            | 0.826991  | -0.172762 | 0.190029  |                               |           |           |           |           |
| O            | 0.544879  | 0.843235  | 0.766117  |                               |           |           |           |           |
| O            | 2.026466  | -0.385932 | -0.370827 |                               |           |           |           |           |
| C            | 2.961393  | 0.681955  | -0.227917 |                               |           |           |           |           |
| H            | 3.154942  | 0.878175  | 0.824965  |                               |           |           |           |           |
| H            | 3.866730  | 0.355835  | -0.728930 |                               |           |           |           |           |
| H            | 2.573168  | 1.588423  | -0.688203 |                               |           |           |           |           |

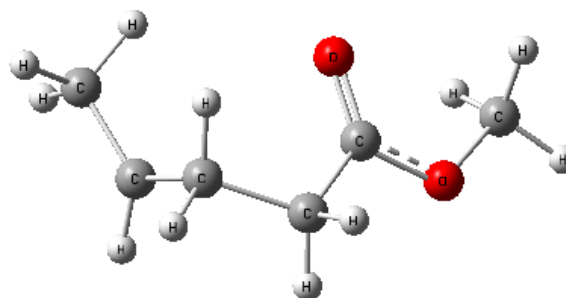

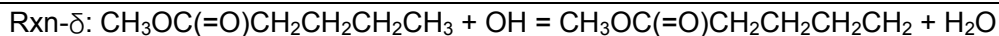

RC- $\delta$

Geometry

|   |           |           |           |
|---|-----------|-----------|-----------|
| C | 2.509179  | -0.413555 | -0.769512 |
| H | 2.186817  | 0.564315  | -0.409505 |
| H | 3.264265  | -0.786925 | -0.075650 |
| H | 2.986976  | -0.261605 | -1.736197 |
| C | 1.344906  | -1.391040 | -0.881105 |
| H | 0.576782  | -0.973456 | -1.539609 |
| H | 1.684279  | -2.311198 | -1.359522 |
| C | 0.718857  | -1.750667 | 0.464783  |
| H | -0.082541 | -2.474464 | 0.315113  |
| H | 1.468298  | -2.225461 | 1.100789  |
| C | 0.156154  | -0.539014 | 1.220589  |
| H | 0.943173  | 0.149395  | 1.520551  |
| H | -0.370460 | -0.877213 | 2.113418  |
| C | -0.815075 | 0.222484  | 0.364511  |
| O | -0.664722 | 1.353883  | -0.037327 |
| O | -1.887916 | -0.503827 | 0.051317  |
| C | -2.840667 | 0.133361  | -0.802044 |
| H | -2.376532 | 0.399361  | -1.749633 |
| H | -3.634317 | -0.590205 | -0.952631 |
| H | -3.225069 | 1.035086  | -0.330341 |
| O | 1.764845  | 2.469059  | 0.870598  |
| H | 0.871595  | 2.253243  | 0.523798  |

Frequency (cm<sup>-1</sup>)

|           |           |           |           |           |
|-----------|-----------|-----------|-----------|-----------|
| 41.2720   | 59.0235   | 95.7006   | 101.8957  | 120.1855  |
| 158.8702  | 166.9292  | 176.4579  | 203.8904  | 262.2923  |
| 329.3568  | 359.0322  | 440.2458  | 476.8757  | 507.4603  |
| 626.7883  | 655.1343  | 725.9089  | 768.2091  | 844.4523  |
| 869.5344  | 916.9236  | 965.3290  | 991.3818  | 1056.9592 |
| 1098.0082 | 1120.8547 | 1143.5946 | 1189.4779 | 1206.4667 |
| 1226.7562 | 1253.6688 | 1311.1888 | 1339.1604 | 1363.4438 |
| 1384.8684 | 1396.7560 | 1421.1068 | 1482.5533 | 1485.7793 |
| 1493.4994 | 1496.9663 | 1501.5483 | 1506.9978 | 1508.5667 |
| 1552.8247 | 1812.1642 | 3044.7170 | 3063.7109 | 3069.8255 |
| 3084.8223 | 3092.0486 | 3095.2904 | 3115.5167 | 3130.5890 |
| 3141.4127 | 3158.1740 | 3160.0497 | 3195.0500 | 3566.6065 |

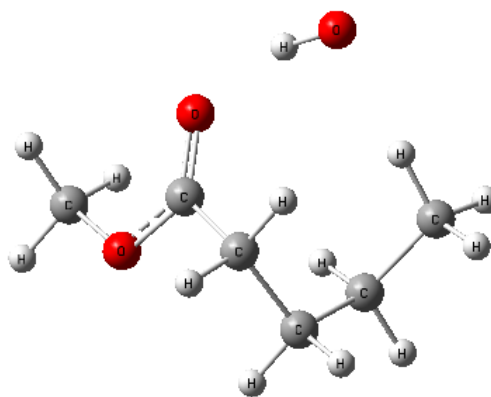

TS- $\delta$

Geometry

|   |           |           |           |
|---|-----------|-----------|-----------|
| C | 2.680480  | -0.218761 | -0.491238 |
| H | 2.353022  | 0.837566  | -0.054966 |
| H | 3.301751  | -0.645982 | 0.296662  |
| H | 3.289215  | 0.043032  | -1.353676 |
| C | 1.491140  | -1.085944 | -0.845535 |
| H | 0.829221  | -0.543357 | -1.524996 |
| H | 1.851965  | -1.953588 | -1.405322 |
| C | 0.707726  | -1.596066 | 0.362520  |
| H | -0.042382 | -2.318024 | 0.035599  |
| H | 1.387354  | -2.125955 | 1.032592  |
| C | 0.007633  | -0.493883 | 1.174740  |
| H | 0.726323  | 0.241738  | 1.529986  |
| H | -0.508401 | -0.939563 | 2.023011  |
| C | -0.997082 | 0.216385  | 0.314421  |
| O | -0.793601 | 1.234302  | -0.304736 |
| O | -2.160287 | -0.435931 | 0.252232  |
| C | -3.148742 | 0.145894  | -0.599649 |
| H | -2.782161 | 0.196334  | -1.622876 |
| H | -4.016098 | -0.501867 | -0.533717 |
| H | -3.391741 | 1.151015  | -0.261736 |
| O | 1.900764  | 2.052873  | 0.346719  |
| H | 0.990637  | 1.951177  | 0.004373  |

Frequency (cm<sup>-1</sup>)

|                   |           |           |           |           |
|-------------------|-----------|-----------|-----------|-----------|
| <b>-1065.0487</b> |           |           |           |           |
| 32.1076           | 81.5233   | 118.9282  | 133.2493  | 168.1725  |
| 174.9243          | 177.4256  | 227.1636  | 325.3664  | 356.3243  |
| 365.0755          | 454.3618  | 466.5727  | 567.4712  | 636.9790  |
| 719.3732          | 755.1613  | 834.2221  | 844.1705  | 886.5764  |
| 915.1553          | 940.5530  | 975.3830  | 1019.6551 | 1067.0542 |
| 1102.6330         | 1130.9748 | 1138.2069 | 1190.0632 | 1197.8842 |
| 1225.8767         | 1248.1276 | 1298.1531 | 1325.9114 | 1332.7945 |
| 1368.5833         | 1384.8348 | 1406.7586 | 1427.8481 | 1467.9320 |
| 1485.3043         | 1486.0257 | 1495.8962 | 1496.9813 | 1505.5075 |
| 1509.8362         | 1817.4191 | 3048.1383 | 3064.6970 | 3080.0814 |
| 3085.2198         | 3091.8231 | 3101.7773 | 3111.7465 | 3160.2354 |
| 3161.3774         | 3161.8318 | 3193.9750 | 3649.1017 |           |

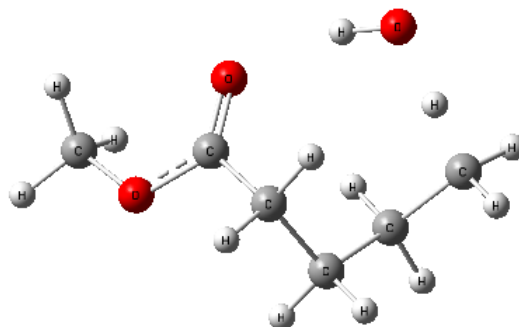

| PC- $\delta$ |           |           |           | Frequency (cm <sup>-1</sup> ) |           |           |           |           |
|--------------|-----------|-----------|-----------|-------------------------------|-----------|-----------|-----------|-----------|
| Geometry     |           |           |           |                               |           |           |           |           |
| C            | 2.455593  | -0.474251 | -0.832253 | 33.0116                       | 53.7490   | 94.0765   | 99.2710   | 122.4904  |
| H            | 2.481836  | 1.985563  | 0.240564  | 147.3417                      | 163.9906  | 168.8887  | 203.5436  | 218.0249  |
| H            | 3.166298  | -0.560711 | -0.021577 | 241.8261                      | 289.6083  | 323.4092  | 352.3832  | 445.0651  |
| H            | 2.737802  | 0.121882  | -1.686846 | 466.0680                      | 532.7165  | 590.4804  | 637.4059  | 733.2695  |
| C            | 1.307680  | -1.415784 | -0.909799 | 800.6044                      | 853.6161  | 889.5261  | 915.3143  | 979.4637  |
| H            | 0.534842  | -1.004902 | -1.566525 | 1034.9387                     | 1066.0831 | 1114.3267 | 1136.6802 | 1177.8685 |
| H            | 1.624413  | -2.353741 | -1.385236 | 1191.5231                     | 1217.1935 | 1227.5870 | 1281.2394 | 1332.8610 |
| C            | 0.704785  | -1.753506 | 0.455394  | 1364.8688                     | 1383.3018 | 1396.1808 | 1466.6848 | 1475.7910 |
| H            | -0.093639 | -2.484331 | 0.328217  | 1485.9204                     | 1488.5801 | 1495.9598 | 1499.7369 | 1510.6736 |
| H            | 1.467977  | -2.212823 | 1.085979  | 1647.8356                     | 1823.4338 | 2996.5453 | 3056.0062 | 3076.3947 |
| C            | 0.153023  | -0.522078 | 1.185861  | 3083.1356                     | 3095.5600 | 3119.7207 | 3156.6240 | 3157.3100 |
| H            | 0.946264  | 0.175325  | 1.446606  | 3159.9363                     | 3192.4758 | 3264.8809 | 3767.1569 | 3929.7116 |
| H            | -0.362654 | -0.834460 | 2.093825  |                               |           |           |           |           |
| C            | -0.823529 | 0.213476  | 0.312388  |                               |           |           |           |           |
| O            | -0.651441 | 1.305823  | -0.172080 |                               |           |           |           |           |
| O            | -1.927482 | -0.504003 | 0.080485  |                               |           |           |           |           |
| C            | -2.889203 | 0.106718  | -0.780652 |                               |           |           |           |           |
| H            | -2.450957 | 0.299587  | -1.758020 |                               |           |           |           |           |
| H            | -3.708543 | -0.599533 | -0.860135 |                               |           |           |           |           |
| H            | -3.231643 | 1.048050  | -0.356077 |                               |           |           |           |           |
| O            | 1.846284  | 2.387677  | 0.836137  |                               |           |           |           |           |
| H            | 0.991286  | 2.199063  | 0.424722  |                               |           |           |           |           |

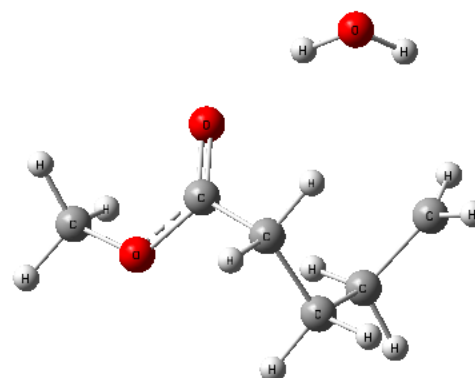

| MP- $\delta$ |           |           |           | Frequency (cm <sup>-1</sup> ) |           |           |           |           |
|--------------|-----------|-----------|-----------|-------------------------------|-----------|-----------|-----------|-----------|
| Geometry     |           |           |           |                               |           |           |           |           |
| C            | 1.238252  | 1.660986  | 0.269890  | 33.7944                       | 87.9677   | 121.3065  | 172.6814  | 190.1462  |
| H            | 1.060796  | 2.582658  | -0.262454 | 197.6330                      | 248.6413  | 310.4179  | 325.4953  | 416.2790  |
| H            | 0.863222  | 1.577587  | 1.279975  | 467.4741                      | 533.5523  | 614.9846  | 718.1998  | 814.8204  |
| C            | 2.207379  | 0.655470  | -0.242783 | 845.3040                      | 885.5997  | 944.6083  | 963.4087  | 1021.5955 |
| H            | 2.312149  | 0.757553  | -1.325814 | 1080.3030                     | 1106.4370 | 1135.9552 | 1181.6997 | 1189.5572 |
| H            | 3.204208  | 0.853126  | 0.174609  | 1221.1270                     | 1238.9437 | 1265.3435 | 1296.0578 | 1368.9632 |
| C            | 1.830178  | -0.789658 | 0.096367  | 1384.5677                     | 1399.4461 | 1464.6717 | 1473.3922 | 1478.8270 |
| H            | 2.627252  | -1.455760 | -0.234176 | 1488.0589                     | 1494.9102 | 1495.7281 | 1507.5363 | 1843.5555 |
| H            | 1.735502  | -0.905678 | 1.177512  | 2992.5363                     | 3068.3773 | 3077.5223 | 3078.2914 | 3082.5000 |
| C            | 0.517578  | -1.223114 | -0.556749 | 3119.6083                     | 3138.0044 | 3150.3981 | 3169.0223 | 3188.1112 |
| H            | 0.390729  | -2.301844 | -0.450066 | 3274.4789                     |           |           |           |           |
| H            | 0.507430  | -0.983475 | -1.619011 |                               |           |           |           |           |
| C            | -0.672185 | -0.586960 | 0.115662  |                               |           |           |           |           |
| O            | -0.873516 | -0.605068 | 1.300949  |                               |           |           |           |           |
| O            | -1.503325 | -0.004459 | -0.759667 |                               |           |           |           |           |
| C            | -2.620609 | 0.660699  | -0.174977 |                               |           |           |           |           |
| H            | -2.275216 | 1.456141  | 0.484200  |                               |           |           |           |           |
| H            | -3.192263 | 1.069789  | -1.001387 |                               |           |           |           |           |
| H            | -3.222637 | -0.038424 | 0.401905  |                               |           |           |           |           |

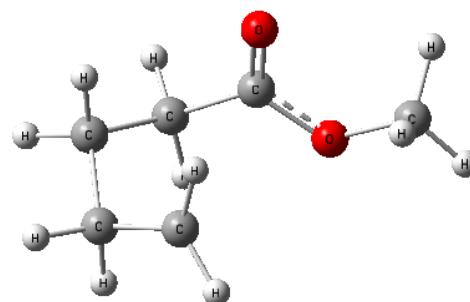

Table S2: Enthalpies of reaction and Gibbs free energies of reaction ( $\Delta H_{r,298.15\text{ K}}$ ,  $\Delta G_{r,298.15\text{ K}}$  in kcal mol<sup>-1</sup> at 298.15 K) at the M06-2X/cc-pVTZ and DLPNO-CCSD(T)/CBS(T-Q) levels.

| Reaction channel | M06-2X/cc-pVTZ                 |                                | DLPNO-CCSD(T)/CBS(T-Q)         |                                |
|------------------|--------------------------------|--------------------------------|--------------------------------|--------------------------------|
|                  | $\Delta H_{r,298.15\text{ K}}$ | $\Delta G_{r,298.15\text{ K}}$ | $\Delta H_{r,298.15\text{ K}}$ | $\Delta G_{r,298.15\text{ K}}$ |
| Rxn- $\alpha'$   | -18.1                          | -19.3                          | -19.1                          | -20.3                          |
| Rxn- $\alpha$    | -24.0                          | -25.1                          | -24.1                          | -25.2                          |
| Rxn- $\beta$     | -18.4                          | -21.1                          | -19.3                          | -21.9                          |
| Rxn- $\gamma$    | -19.2                          | -21.1                          | -19.7                          | -21.6                          |
| Rxn- $\delta$    | -16.5                          | -17.4                          | -16.8                          | -17.7                          |

Table S3: Calculated MS-T factors for MP and each TS by using the full high-level MS-T (M06-2X) and dual-level MS-T (M06-2X/AM1) methods.

| T(K) | MP     | TS- $\alpha'$ | TS- $\alpha$ | TS- $\beta$ | TS- $\gamma$ | TS- $\delta$ |            |
|------|--------|---------------|--------------|-------------|--------------|--------------|------------|
|      | M06-2X | M06-2X/AM1    | M06-2X       | M06-2X      | M06-2X       | M06-2X       | M06-2X/AM1 |
| 200  | 5.146  | 11.846        | 4.346        | 2.493       | 6.793        | 2.399        | 2.44       |
| 250  | 6.963  | 14.661        | 6.199        | 2.965       | 8.518        | 2.805        | 2.693      |
| 298  | 8.793  | 17.274        | 8.144        | 3.485       | 12.326       | 3.748        | 3.327      |
| 350  | 10.746 | 20.060        | 10.31        | 4.168       | 19.837       | 5.918        | 4.836      |
| 400  | 12.516 | 22.777        | 12.359       | 4.992       | 30.963       | 9.646        | 7.449      |
| 500  | 15.563 | 28.575        | 16.123       | 7.267       | 64.433       | 23.102       | 16.823     |
| 600  | 17.864 | 34.977        | 19.25        | 10.355      | 108.742      | 44.341       | 31.428     |
| 700  | 19.454 | 41.811        | 21.691       | 13.993      | 157.228      | 71.08        | 49.622     |
| 800  | 20.439 | 48.747        | 23.493       | 17.827      | 204.161      | 100.289      | 69.387     |
| 900  | 20.938 | 55.453        | 24.743       | 21.548      | 245.859      | 129.306      | 89.018     |
| 1000 | 21.063 | 61.671        | 25.534       | 24.94       | 280.518      | 156.232      | 107.325    |
| 1200 | 20.554 | 72.028        | 26.071       | 30.313      | 327.6        | 199.853      | 137.499    |
| 1400 | 19.461 | 79.279        | 25.656       | 33.691      | 349.012      | 228.226      | 158.027    |
| 1600 | 18.115 | 83.607        | 24.672       | 35.341      | 351.854      | 243.047      | 169.826    |
| 1800 | 16.701 | 85.500        | 23.37        | 35.678      | 342.637      | 247.429      | 174.71     |
| 2000 | 15.318 | 85.508        | 21.915       | 35.093      | 326.275      | 244.43       | 174.52     |

Table S4: Calculated rate constants ( $\text{cm}^3 \text{mol}^{-1} \text{s}^{-1}$ ) for each reaction channel after compensating the uncertainty of energy barriers.

| T (K) | Rxn- $\alpha'$ | Rxn- $\alpha$ | Rxn- $\beta$ | Rxn- $\gamma$ | Rxn- $\delta$ |
|-------|----------------|---------------|--------------|---------------|---------------|
| 200   | 6.05072E10     | 1.88455E12    | 3.85457E13   | 3.47084E11    | 3.16479E11    |
| 250   | 3.11766E10     | 7.35666E11    | 8.43879E12   | 1.7405E11     | 9.29623E10    |
| 298   | 2.39942E10     | 4.93534E11    | 3.27659E12   | 1.44425E11    | 5.49718E10    |
| 350   | 2.19762E10     | 4.13221E11    | 1.72681E12   | 1.56768E11    | 4.89967E10    |
| 400   | 2.24248E10     | 3.96521E11    | 1.19541E12   | 1.90966E11    | 5.55716E10    |
| 500   | 2.74714E10     | 4.35581E11    | 8.90056E11   | 3.06136E11    | 8.90006E10    |
| 600   | 3.74133E10     | 5.29024E11    | 9.01065E11   | 4.78487E11    | 1.4593E11     |
| 700   | 5.30049E10     | 6.65479E11    | 1.03926E12   | 7.10193E11    | 2.28393E11    |
| 800   | 7.55933E10     | 8.45E11       | 1.26054E12   | 1.00564E12    | 3.40001E11    |
| 900   | 1.06803E11     | 1.07089E12    | 1.55445E12   | 1.3696E12     | 4.84663E11    |
| 1000  | 1.48417E11     | 1.34741E12    | 1.91568E12   | 1.80647E12    | 6.66185E11    |
| 1200  | 2.70352E11     | 2.07107E12    | 2.85208E12   | 2.91399E12    | 1.15342E12    |
| 1400  | 4.5673E11      | 3.05273E12    | 4.08699E12   | 4.35272E12    | 1.82577E12    |
| 1600  | 7.22616E11     | 4.32558E12    | 5.63709E12   | 6.13853E12    | 2.70177E12    |
| 1800  | 1.08231E12     | 5.9174E12     | 7.51756E12   | 8.28064E12    | 3.79504E12    |
| 2000  | 1.54897E12     | 7.85044E12    | 9.73746E12   | 1.07822E13    | 5.11502E12    |

## An example of input file for MESS code

```
! MP + OH => RC_delta => TS_delta => MP_delta + H2O
! Reactants  W1      B      Products
!
! Frequencies calculated at M06-2X/cc-pVTZ (scaled by 0.985), energies at DLPNO-CCSD(T)/CBS
! Reactants set to zero of energy
!
TemperatureList[K]  200 250 298 350 400 500 600 700 800 900 1000 1200 1400 1600 1800 2000
PressureList[atm]  1
EnergyStepOverTemperature  0.2
ExcessEnergyOverTemperature  30
ModelEnergyLimit[kcal/mol]  250
!
WellCutoff  10
ChemicalEigenvalueMax  0.2
ChemicalEigenvalueMin  1.e-6
CalculationMethod  direct
EigenvalueOutput  eigenvalue.out
! End of global input
!
Model
EnergyRelaxation
  Exponential
    Factor[1/cm]  200  ! Delta E down
    Power  0.85  ! Exponent normally 0.85
    ExponentCutoff  15
  End
CollisionFrequency
  LennardJones
    Epsilons[K]  362  143.78
    Sigmas[angstrom]  7.34  3.3237
    Masses[amu]  133  40
  End
! %%%%%%%%%%%
%%%%%%%%%%
Well  W1  #RC_delta
Species
RRHO
Geometry[angstrom]  22
C  2.509179  -0.413555  -0.769512
H  2.186817  0.564315  -0.409505
H  3.264265  -0.786925  -0.075650
H  2.986976  -0.261605  -1.736197
C  1.344906  -1.391040  -0.881105
H  0.576782  -0.973456  -1.539609
H  1.684279  -2.311198  -1.359522
C  0.718857  -1.750667  0.464783
H  -0.082541  -2.474464  0.315113
```

|   |           |           |           |
|---|-----------|-----------|-----------|
| H | 1.468298  | -2.225461 | 1.100789  |
| C | 0.156154  | -0.539014 | 1.220589  |
| H | 0.943173  | 0.149395  | 1.520551  |
| H | -0.370460 | -0.877213 | 2.113418  |
| C | -0.815075 | 0.222484  | 0.364511  |
| O | -0.664722 | 1.353883  | -0.037327 |
| O | -1.887916 | -0.503827 | 0.051317  |
| C | -2.840667 | 0.133361  | -0.802044 |
| H | -2.376532 | 0.399361  | -1.749633 |
| H | -3.634317 | -0.590205 | -0.952631 |
| H | -3.225069 | 1.035086  | -0.330341 |
| O | 1.764845  | 2.469059  | 0.870598  |
| H | 0.871595  | 2.253243  | 0.523798  |

Core RigidRotor

SymmetryFactor 1

End

Frequencies[1/cm] 60

40.6529  
58.1381  
94.2650  
100.3672  
118.3827  
156.4871  
164.4252  
173.8110  
200.8320  
258.3579  
324.4164  
353.6467  
433.6421  
469.7225  
499.8484  
617.3864  
645.3072  
715.0202  
756.6859  
831.7855  
856.4913  
903.1697  
950.8490  
976.5110  
1041.1048  
1081.5380  
1104.0418  
1126.4406  
1171.6357  
1188.3697  
1208.3548  
1234.8637



1291.5209  
1319.0729  
1342.9921  
1364.0953  
1375.8046  
1399.7902  
1460.3150  
1463.4926  
1471.0969  
1474.5118  
1479.0250  
1484.3928  
1485.9382  
1529.5323  
1784.9817  
2999.0462  
3017.7552  
3023.7781  
3038.5499  
3045.6678  
3048.8610  
3068.7839  
3083.6301  
3094.2915  
3110.8013  
3112.6489  
3147.1242  
3513.1074

ZeroEnergy[kcal/mol] -3.5

ElectronicLevels[1/cm] 1

0.0 2

End

End

! %%%%%%%%%%  
%%%%%%%%%

Bimolecular R !MP + OH

Fragment !MP

RRHO

Geometry[angstrom] 20

|   |          |           |           |
|---|----------|-----------|-----------|
| C | 3.440908 | -0.646981 | -0.149164 |
| H | 3.877311 | -1.328189 | -0.878637 |
| H | 4.106518 | 0.212312  | -0.052331 |
| H | 3.416543 | -1.158181 | 0.813978  |
| C | 2.041480 | -0.208168 | -0.559209 |
| H | 2.077714 | 0.275251  | -1.539483 |
| H | 1.395923 | -1.082324 | -0.658767 |
| C | 1.423611 | 0.754000  | 0.449226  |
| H | 1.387886 | 0.274886  | 1.429380  |
| H | 2.061116 | 1.635618  | 0.545098  |

|   |           |           |           |
|---|-----------|-----------|-----------|
| C | 0.021364  | 1.199315  | 0.064348  |
| H | -0.015993 | 1.578623  | -0.958470 |
| H | -0.328045 | 2.014902  | 0.701881  |
| C | -0.998473 | 0.095984  | 0.191498  |
| O | -0.826415 | -0.957531 | 0.742530  |
| O | -2.164927 | 0.442187  | -0.374313 |
| C | -3.203870 | -0.529077 | -0.266088 |
| H | -3.425215 | -0.732796 | 0.779853  |
| H | -4.067403 | -0.099918 | -0.763251 |
| H | -2.905742 | -1.457876 | -0.748653 |

Core RigidRotor

SymmetryFactor 1

End

Frequencies[1/cm] 54

38.6549

70.9374

104.2851

162.5212

178.2944

220.0834

246.6966

259.2981

311.2111

372.0607

522.6355

585.1140

653.7702

741.0068

840.2382

846.8352

916.2097

942.0672

1012.9145

1051.8861

1067.3937

1112.4675

1131.7894

1173.8101

1201.1492

1218.4183

1240.3428

1264.9169

1312.2740

1317.3940

1385.1845

1390.9957

1392.5683

1442.2113

1460.8852

1465.8255  
1473.8214  
1474.1157  
1482.3517  
1487.8249  
1489.589  
1822.4610  
3004.2503  
3012.0279  
3017.6379  
3026.5086  
3035.5355  
3046.4931  
3060.4215  
3069.1030  
3081.8289  
3088.4327  
3107.4166  
3140.8322

ZeroEnergy[kcal/mol] 0.0  
ElectronicLevels[1/cm] 1  
0.0 1

End

!

Fragment !OH

RRHO

Geometry[angstrom] 2 !

O 0.000000 0.000000 0.106747  
H 0.000000 0.000000 -0.864787

Core RigidRotor

SymmetryFactor 1

End

Frequencies[1/cm] 1

3717.8991

ZeroEnergy[kcal/mol] 0.0 !

ElectronicLevels[1/cm] 1

0.0 2

End

GroundEnergy[kcal/mol] 0.0 ! Reactants: 0.0

End

! %%%%%%%%%%

Bimolecular P ! MP\_delta + H2O

Fragment ! MP\_delta

RRHO

Geometry[angstrom] 19

C 1.238252 1.660986 0.269890  
H 1.060796 2.582658 -0.262454  
H 0.863222 1.577587 1.279975  
C 2.207379 0.655470 -0.242783

|   |           |           |           |
|---|-----------|-----------|-----------|
| H | 2.312149  | 0.757553  | -1.325814 |
| H | 3.204208  | 0.853126  | 0.174609  |
| C | 1.830178  | -0.789658 | 0.096367  |
| H | 2.627252  | -1.455760 | -0.234176 |
| H | 1.735502  | -0.905678 | 1.177512  |
| C | 0.517578  | -1.223114 | -0.556749 |
| H | 0.390729  | -2.301844 | -0.450066 |
| H | 0.507430  | -0.983475 | -1.619011 |
| C | -0.672185 | -0.586960 | 0.115662  |
| O | -0.873516 | -0.605068 | 1.300949  |
| O | -1.503325 | -0.004459 | -0.759667 |
| C | -2.620609 | 0.660699  | -0.174977 |
| H | -2.275216 | 1.456141  | 0.484200  |
| H | -3.192263 | 1.069789  | -1.001387 |
| H | -3.222637 | -0.038424 | 0.401905  |

Core RigidRotor

SymmetryFactor 1

End

Frequencies[1/cm] 51

33.2874

86.6481

119.4869

170.0911

187.2940

194.6685

244.9116

305.7616

320.6128

410.0348

460.4619

525.5490

605.7598

707.4268

802.5980

832.6244

872.3157

930.4391

948.9575

1006.2715

1064.0984

1089.8404

1118.9158

1163.9742

1171.7138

1202.8101

1220.3595

1246.3633

1276.6169

1348.4287

1363.7991  
1378.4544  
1442.7016  
1451.2913  
1456.6446  
1465.7380  
1472.4865  
1473.2921  
1484.9232  
1815.9021  
2947.6482  
3022.3516  
3031.3594  
3032.1170  
3036.2625  
3072.8141  
3090.9343  
3103.1421  
3121.4869  
3140.2895  
3225.3617

ZeroEnergy[kcal/mol] 0.0

ElectronicLevels[1/cm] 1

0.0 2

End

!

Fragment ! H2O

RRHO

Geometry[angstrom] 3

O 0.000000 0.115777 -0.000000

H 0.759563 -0.469814 0.000000

H -0.759563 -0.469814 -0.000000

Core RigidRotor

SymmetryFactor 2

End

Frequencies[1/cm] 3

1604.7215

3813.7819

3913.8209

ZeroEnergy[kcal/mol] 0.0

ElectronicLevels[1/cm] 1

0.0 1

End

GroundEnergy[kcal/mol] -17.0

End

! %%%%%%%%%%%

Barrier B1 W1 P !RC\_delta => TS\_delta => MP\_delta + H2O

RRHO

Geometry[angstrom] 22 ! TS\_delta

|   |           |           |           |
|---|-----------|-----------|-----------|
| C | 2.680480  | -0.218761 | -0.491238 |
| H | 2.353022  | 0.837566  | -0.054966 |
| H | 3.301751  | -0.645982 | 0.296662  |
| H | 3.289215  | 0.043032  | -1.353676 |
| C | 1.491140  | -1.085944 | -0.845535 |
| H | 0.829221  | -0.543357 | -1.524996 |
| H | 1.851965  | -1.953588 | -1.405322 |
| C | 0.707726  | -1.596066 | 0.362520  |
| H | -0.042382 | -2.318024 | 0.035599  |
| H | 1.387354  | -2.125955 | 1.032592  |
| C | 0.007633  | -0.493883 | 1.174740  |
| H | 0.726323  | 0.241738  | 1.529986  |
| H | -0.508401 | -0.939563 | 2.023011  |
| C | -0.997082 | 0.216385  | 0.314421  |
| O | -0.793601 | 1.234302  | -0.304736 |
| O | -2.160287 | -0.435931 | 0.252232  |
| C | -3.148742 | 0.145894  | -0.599649 |
| H | -2.782161 | 0.196334  | -1.622876 |
| H | -4.016098 | -0.501867 | -0.533717 |
| H | -3.391741 | 1.151015  | -0.261736 |
| O | 1.900764  | 2.052873  | 0.346719  |
| H | 0.990637  | 1.951177  | 0.004373  |

Core RigidRotor

SymmetryFactor 1

End

Tunneling

Eckart

ImaginaryFrequency[1/cm] 1065.05

WellDepth[kcal/mol] 3.1 ! TSa - RCa

WellDepth[kcal/mol] 16.6 ! TSa - Products-a

End

Frequencies[1/cm] 59

31.6259

80.3004

117.1442

131.2505

165.6499

172.3004

174.7642

223.7561

320.4859

350.9794

359.5993

447.5463

459.5741

558.9591

627.4243

708.5826

743.8338

821.7087

831.5079  
873.2777  
901.4279  
926.4447  
960.7522  
1004.3602  
1051.0483  
1086.0935  
1114.0101  
1121.1338  
1172.2122  
1179.9159  
1207.4885  
1229.4056  
1278.6808  
1306.0227  
1312.8025  
1348.0545  
1364.0622  
1385.6572  
1406.4303  
1445.9130  
1463.0247  
1463.7353  
1473.4577  
1474.5265  
1482.9248  
1487.1886  
1790.1578  
3002.4162  
3018.7265  
3033.8801  
3038.9415  
3045.4457  
3055.2506  
3065.0703  
3112.8318  
3113.9567  
3114.4043  
3146.0653  
3594.3651

ZeroEnergy[kcal/mol]        -0.4  
ElectronicLevels[1/cm]       1  
0.0    2

End

! %%%%%%%%%%

! %%%%%%%%%%

Barrier B2 W1 R! MP + OH => RC\_delta

RRHO



## Stoichiometry C6H13O3

Core PhaseSpaceTheory ! V(R) = -C/(R)^6 R=3.517

FragmentGeometry[angstrom] 20 ! MP

|   |           |           |           |
|---|-----------|-----------|-----------|
| C | 3.440908  | -0.646981 | -0.149164 |
| H | 3.877311  | -1.328189 | -0.878637 |
| H | 4.106518  | 0.212312  | -0.052331 |
| H | 3.416543  | -1.158181 | 0.813978  |
| C | 2.041480  | -0.208168 | -0.559209 |
| H | 2.077714  | 0.275251  | -1.539483 |
| H | 1.395923  | -1.082324 | -0.658767 |
| C | 1.423611  | 0.754000  | 0.449226  |
| H | 1.387886  | 0.274886  | 1.429380  |
| H | 2.061116  | 1.635618  | 0.545098  |
| C | 0.021364  | 1.199315  | 0.064348  |
| H | -0.015993 | 1.578623  | -0.958470 |
| H | -0.328045 | 2.014902  | 0.701881  |
| C | -0.998473 | 0.095984  | 0.191498  |
| O | -0.826415 | -0.957531 | 0.742530  |
| O | -2.164927 | 0.442187  | -0.374313 |
| C | -3.203870 | -0.529077 | -0.266088 |
| H | -3.425215 | -0.732796 | 0.779853  |
| H | -4.067403 | -0.099918 | -0.763251 |
| H | -2.905742 | -1.457876 | -0.748653 |

FragmentGeometry[angstrom] 2 ! OH

|   |          |          |           |
|---|----------|----------|-----------|
| O | 0.000000 | 0.000000 | 0.106747  |
| H | 0.000000 | 0.000000 | -0.864787 |

SymmetryFactor 1

PotentialPrefactor[au] 480.7 ! C

PotentialPowerExponent 6 ! n

End

Frequencies[1/cm] 55

38.6549  
70.9374  
104.2851  
162.5212  
178.2944  
220.0834  
246.6966  
259.2981  
311.2111  
372.0607  
522.6355  
585.1140  
653.7702  
741.0068  
840.2382  
846.8352  
916.2097  
942.0672

1012.9145  
1051.8861  
1067.3937  
1112.4675  
1131.7894  
1173.8101  
1201.1492  
1218.4183  
1240.3428  
1264.9169  
1312.2740  
1317.3940  
1385.1845  
1390.9957  
1392.5683  
1442.2113  
1460.8852  
1465.8255  
1473.8214  
1474.1157  
1482.3517  
1487.8249  
1489.589  
1822.4610  
3004.2503  
3012.0279  
3017.6379  
3026.5086  
3035.5355  
3046.4931  
3060.4215  
3069.1030  
3081.8289  
3088.4327  
3107.4166  
3140.8322  
3717.8991

ZeroEnergy[kcal/mol] 0.0

ElectronicLevels[1/cm] 1

0.0 2

End

End

!
